# Supplementary material for: Synergistic Effects of Melatonin and Gamma-Aminobutyric Acid on Protection of Photosynthesis System in Response to Multiple Abiotic Stressors
Source: MDPI journal article supplement (doi:10.3390/cells10071631), 2021-06-29
Supplement: s1 [file s1]

**Supplementary Table S1.** Measured parameters related to OJIP test (Kalaji 2017)

| Abbreviation | Equation                                                                 | Definition                                                                                                                          |
|--------------|--------------------------------------------------------------------------|-------------------------------------------------------------------------------------------------------------------------------------|
| $F_V/F_0$    | $\phi P_0/(1 - \phi P_0)$                                                | Maximum efficiency of the water diffusion reaction on the donor side of PSII                                                        |
| $F_V/F_M$    | $TR_0/ABS = [1 - (F_0/F_M)]$                                             | Relative maximal variable fluorescence                                                                                              |
| $\Psi_0$     | $ET_0/TR_0 = (1 - V_J)$                                                  | The probability that a trapped exciton proceed an electron through ETC beyond $Q_A^-$                                               |
| $\phi E_0$   | $ET_0/ABS = [1 - (F_0/F_M)] \Psi_0 = \phi P_0 \cdot \Psi_0$              | Quantum yield of electron transport (at $t = 0$ )                                                                                   |
| $\phi D_0$   | $1 - \phi P_0 = (F_0/F_M)$                                               | Quantum yield of energy dissipation                                                                                                 |
| $\Phi_{PAV}$ | $\phi P_0 (1 - V_{av}) = \phi P_0 (S_m / tF_M)$                          | Average quantum yield of primary photochemical reactions (from time 0 to $tF_M$ ).                                                  |
| ABS/RC       | $M_0 (1/V_J)(1/\phi P_0)$                                                | Light absorbance flux for PSII antenna Chlorophylls per reaction center                                                             |
| $TR_0/RC$    | $M_0 (1/V_J)$                                                            | Trapped energy flux per reaction center                                                                                             |
| $ET_0/RC$    | $M_0 (1/V_J) \Psi_0$                                                     | Electron transport flux per reaction center                                                                                         |
| $DI_0/RC$    | $(ABS/RC) - (TR_0/RC)$                                                   | Energy flux not intercepted by an RC, dissipated in the form of heat, fluorescence, or transfer to other systems, at time $t = 0$ . |
| $PI_{abs}$   | $(RC/ABS) \times (\phi P_0/(1 - \phi P_0)) \times (\Psi_0/(1 - \Psi_0))$ | Performance index per absorbed light                                                                                                |

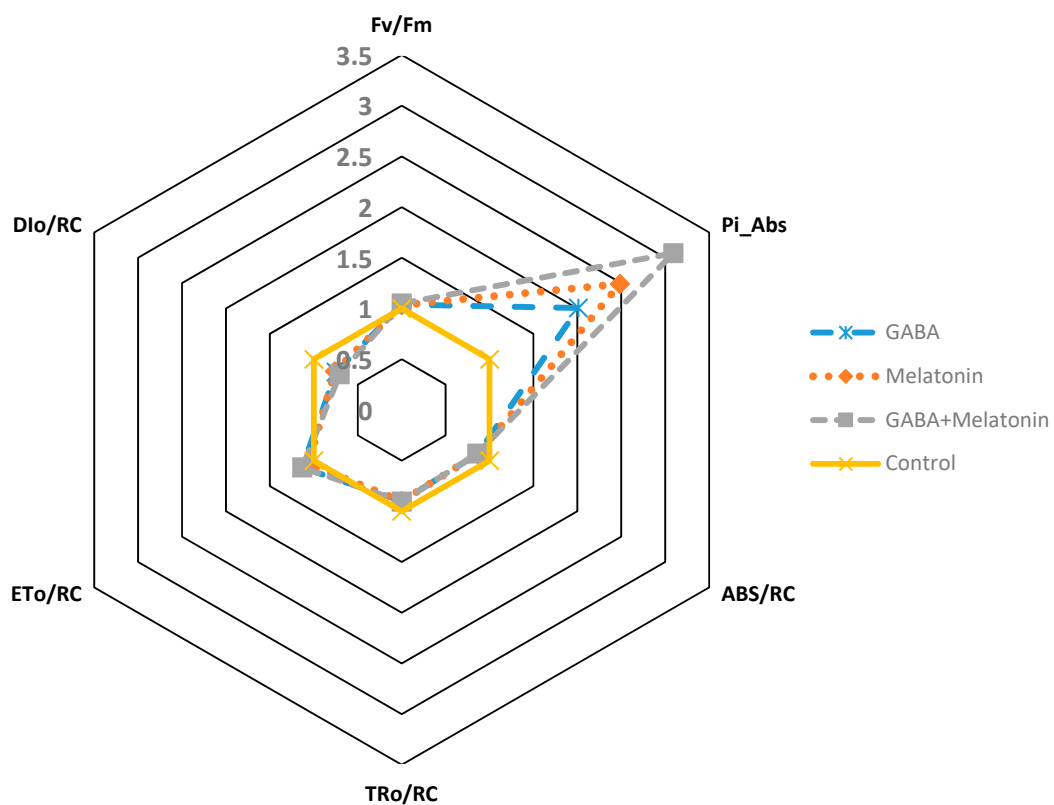

**Supplementary Figure S1.** The effect of Gamma-Aminobutyric Acid [(GABA (20  $\mu$ M))], melatonin (200  $\mu$ M) and GABA (20  $\mu$ M) + melatonin (200  $\mu$ M) on OJIP transients of *Vicia faba*

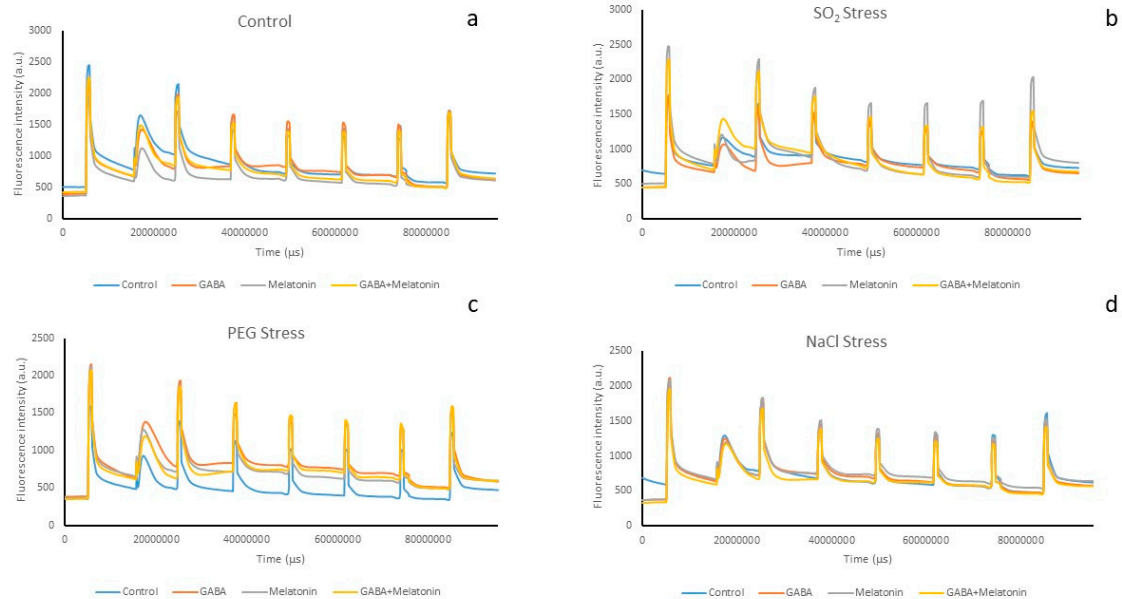

**Supplementary Figure S2.** Fluorescence induction kinetics of *Vicia faba* plants primed with GABA (20 μM), melatonin (200 μM) and GABA (20 μM) + melatonin (200 μM) (a), SO<sub>2</sub> stress (2 ppm) (b), PEG stress (-8 bar) (c) and when exposed to NaCl stress (100 mM) (d).

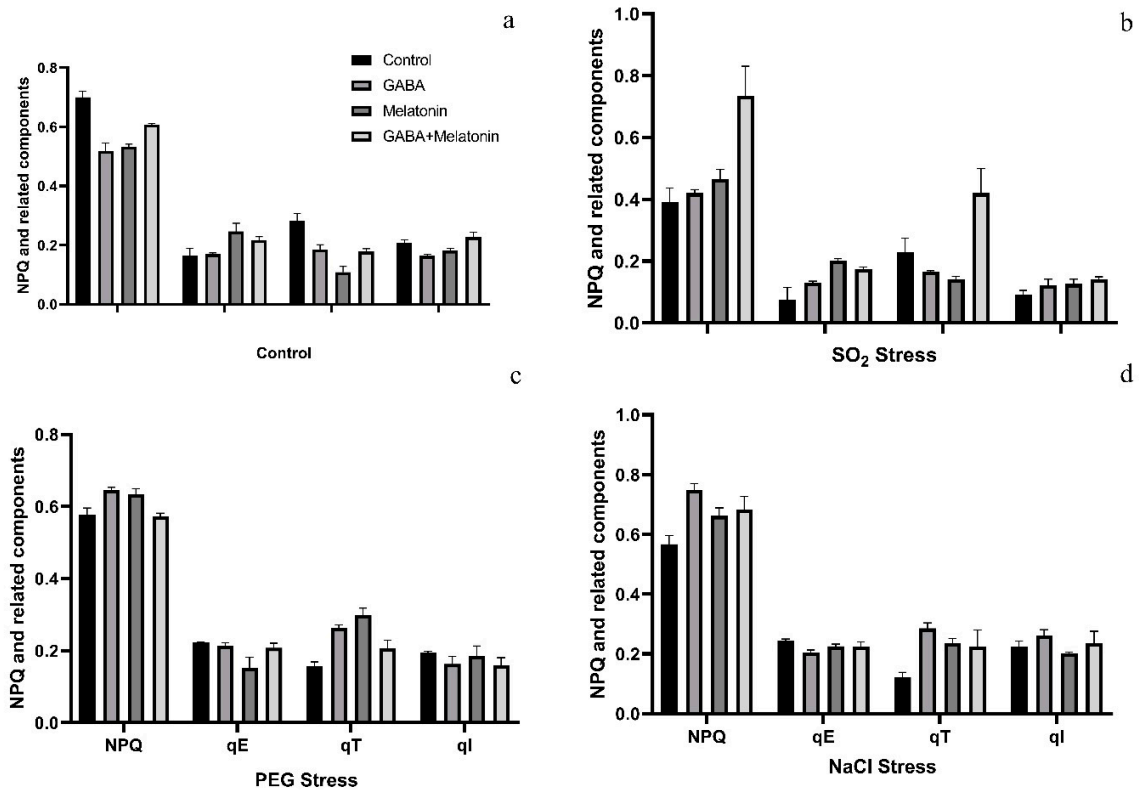

**Supplementary Figure S3.** NPQ and its components (qE, qT, qI) of *Vicia faba* plants primed with GABA (20  $\mu$ M), melatonin (200  $\mu$ M) and GABA (20  $\mu$ M) + melatonin (200  $\mu$ M) (a), when exposed to SO<sub>2</sub> stress (2 ppm) (b), PEG stress (-8 bar) (c) and NaCl stress (100 mM) (d).

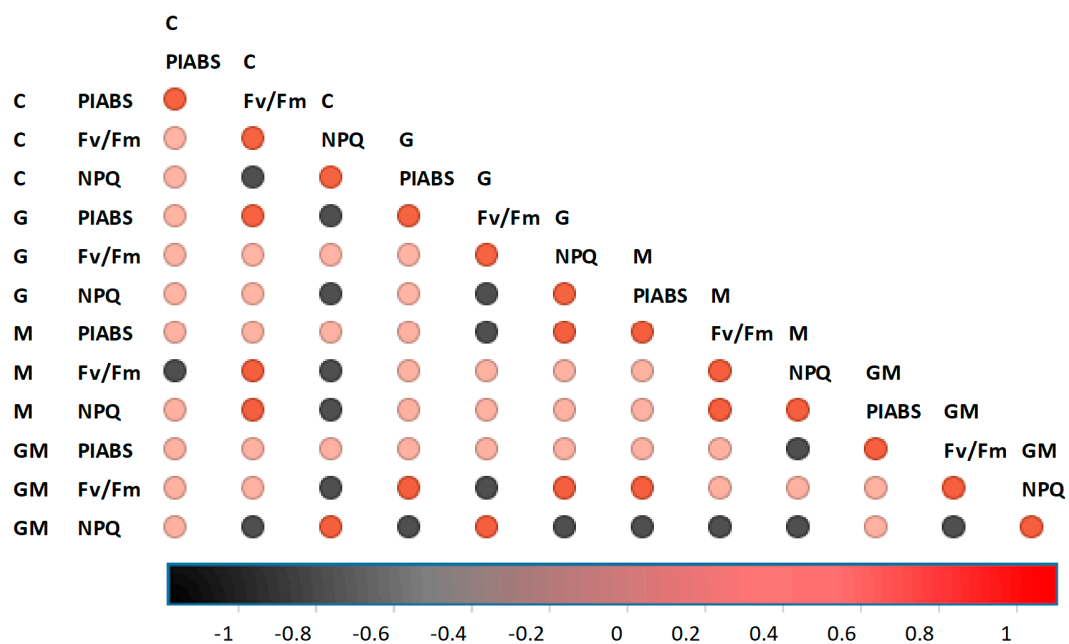

**Supplementary Figure S4.** Graphical representation of a correlation matrix of initial PI<sub>ABS</sub> with F<sub>v</sub>/F<sub>m</sub> and NPQ in control and leaf discs of *Vicia faba* primed with Gamma-Aminobutyric Acid [(GABA (20 μM)], melatonin (200 μM) and GABA (20 μM) + melatonin (200 μM) . Red color represents positive correlation whereas black represents negative correlation. Color intensity is proportional to the correlation, which depicted in the legend at the bottom.

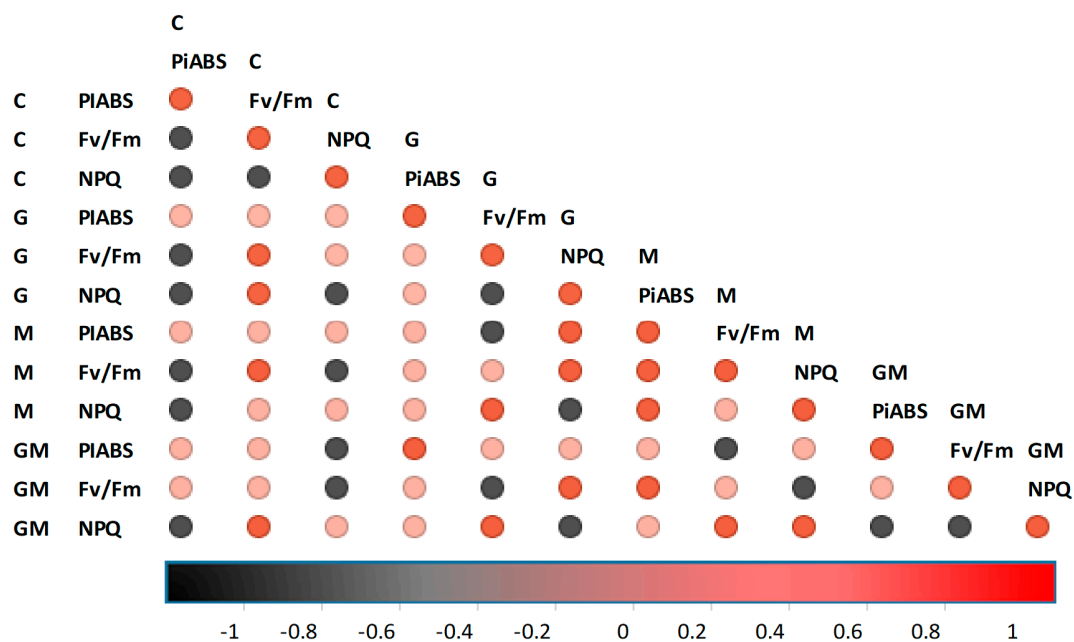

**Supplementary Figure S5.** Graphical representation of a correlation matrix of initial  $PI_{ABS}$  with  $F_v/F_m$  and NPQ in control and leaf discs of *Vicia faba* primed with Gamma-Aminobutyric Acid [(GABA (20  $\mu$ M)], melatonin (200  $\mu$ M) and GABA (20  $\mu$ M) + melatonin (200  $\mu$ M) when exposed to PEG stress. Red color represents positive correlation whereas black represents negative correlation. Color intensity is proportional to the correlation, which depicted in the legend at the bottom.

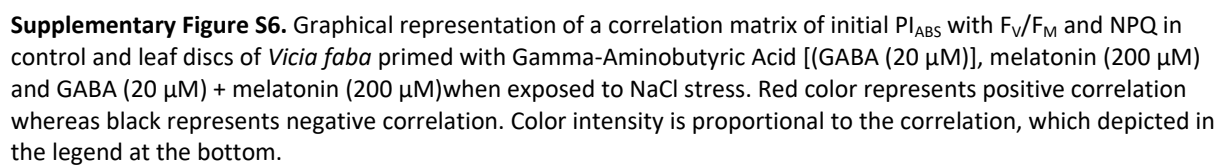

**Supplementary Figure S6.** Graphical representation of a correlation matrix of initial PI<sub>ABS</sub> with F<sub>V</sub>/F<sub>M</sub> and NPQ in control and leaf discs of *Vicia faba* primed with Gamma-Aminobutyric Acid [(GABA (20 μM)], melatonin (200 μM) and GABA (20 μM) + melatonin (200 μM) when exposed to NaCl stress. Red color represents positive correlation whereas black represents negative correlation. Color intensity is proportional to the correlation, which depicted in the legend at the bottom.

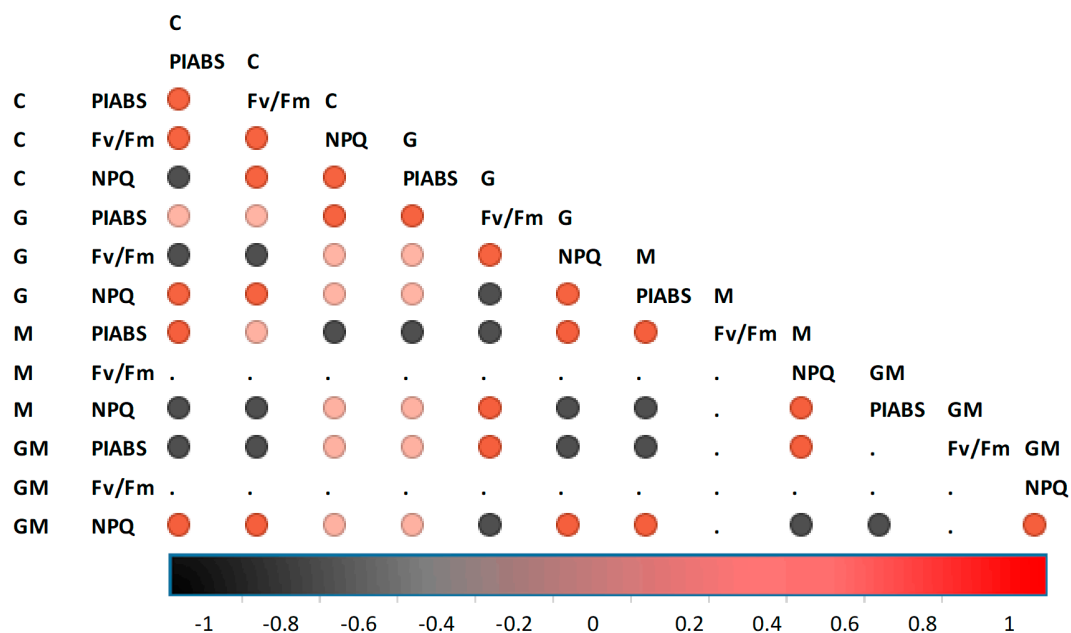

**Supplementary Figure S7.** Graphical representation of a correlation matrix of initial PI<sub>ABS</sub> with F<sub>v</sub>/F<sub>m</sub> and NPQ in control and leaf discs of *Vicia faba* primed with Gamma-Aminobutyric Acid [(GABA (20 μM)], melatonin (200 μM) and GABA (20 μM) + melatonin (200 μM) when exposed to SO<sub>2</sub> stress. Red color represents positive correlation whereas black represents negative correlation. Color intensity is proportional to the correlation, which is depicted in the legend at the bottom.
